# Supplementary material
Source: PubMed Central journal article supplement (PMC8581996)
Supplement: NIHMS1708314-supplement-Supplemental_Publication_Material.pdf [file NIHMS1708314-supplement-Supplemental_Publication_Material.pdf]

## **DATA SUPPLEMENT**

### **Adherence to Recommended Eating Patterns is Associated With Lower Risk of Peripheral Arterial Disease: Results From the Women's Health Initiative**

Guo-Chong Chen, MD, PhD<sup>1</sup>; Rhonda Arthur, PhD<sup>1</sup>; Yasmin Mossavar-Rahmani, PhD<sup>1</sup>; Xiaonan Xue, PhD<sup>1</sup>; Bernhard Haring, MD, MPH<sup>2</sup>; Aladdin H. Shadyab, PhD<sup>3</sup>; Matthew A. Allison, MD, MPH<sup>3</sup>; Simin Liu, MD, ScD<sup>4</sup>; Lesley F. Tinker, PhD, RD<sup>5</sup>; Nazmus Saquib, PhD<sup>6</sup>; Mace Coday, PhD<sup>7</sup>; James M. Shikany, DrPH<sup>8</sup>; Marian L. Neuhouser, PhD, RD<sup>5</sup>; Linda G. Snetselaar, PhD, RD<sup>9</sup>; Linda Van Horn, PhD<sup>10</sup>; Thomas E. Rohan, MBBS, PhD<sup>1</sup>; Sylvia Wassertheil-Smoller, PhD<sup>1</sup>; Robert C. Kaplan, PhD<sup>1,11</sup>; and Qibin Qi, PhD<sup>1,12\*</sup>

1. Department of Epidemiology and Population Health, Albert Einstein College of Medicine, Bronx, NY.
2. Department of Cardiology, University Heart Center Graz, Medical University of Graz, Austria.
3. Department of Family Medicine and Public Health, University of California, San Diego, School of Medicine, La Jolla, CA.
4. Center for Global Cardiometabolic Health and Departments of Epidemiology, Medicine, and Surgery, Brown University, Providence, RI.
5. Division of Public Health Sciences, Fred Hutchinson Cancer Research Center, Seattle, WA.
6. College of Medicine, Sulaiman AlRajhi University, Al Bukayriah, Saudi Arabia.
7. Department of Preventive Medicine, University of Tennessee Health Science Center, Memphis, TN.
8. Division of Preventive Medicine, School of Medicine, University of Alabama at Birmingham, Birmingham, Alabama.
9. Department of Epidemiology, College of Public Health, University of Iowa, Iowa, IA.
10. Department of Preventive Medicine, Northwestern University Feinberg School of Medicine, Chicago, IL.
11. Public Health Sciences Division, Fred Hutchinson Cancer Research Center, Seattle, WA.
12. Department of Nutrition, Harvard T.H. Chan School of Public Health, Boston, MA.

\*Correspondence to: Qibin Qi, PhD

Department of Epidemiology and Population Health, Albert Einstein College of Medicine, 1300 Morris Park Avenue, Bronx, NY 10461.

Telephone: 718-430-4203;

Fax: 718-430-8780;

E-mail: [qibin.qi@einsteinmed.org](mailto:qibin.qi@einsteinmed.org)

**Table S1. Alternate Mediterranean Diet (aMED) components and criteria for scoring**

| <b>Component</b>              | <b>Criteria for min point (0)</b> | <b>Criteria for max point (1)</b> |
|-------------------------------|-----------------------------------|-----------------------------------|
| Vegetables excluding potatoes | < Median                          | ≥ Median                          |
| Fruit excluding juices        | < Median                          | ≥ Median                          |
| Whole grain                   | < Median                          | ≥ Median                          |
| Nuts                          | < Median                          | ≥ Median                          |
| Legumes                       | < Median                          | ≥ Median                          |
| Red and processed meat        | ≥ Median                          | < Median                          |
| Fish and shellfish            | < Median                          | ≥ Median                          |
| MUFA:SFA ratio                | < Median                          | ≥ Median                          |
| Alcohol                       | < 5 or >15 g/d                    | 5-15 g/d                          |
| <b>TOTAL</b>                  | <b>0</b>                          | <b>9</b>                          |

MUFA, monounsaturated fatty acids; SFA, saturated fatty acids.

**Table S2. Alternative Healthy Eating Index (AHEI)-2010 components and criteria for scoring**

| <b>Component</b>              | <b>Criteria for min point (0)</b> | <b>Criteria for max point (10)</b> |
|-------------------------------|-----------------------------------|------------------------------------|
| Vegetables excluding potatoes | 0                                 | ≥ 5 servings/d                     |
| Fruit excluding juices        | 0                                 | ≥ 4 servings/d                     |
| Whole grain                   | 0                                 | ≥ 5 servings/d                     |
| Nuts and legumes              | 0                                 | ≥ 1 serving/d                      |
| Marine PUFA (EPA + DHA)       | 0                                 | ≥ 250 mg/d                         |
| Non-marine PUFA               | ≤ 2% of total energy              | ≥ 10% of total energy              |
| SSB and fruit juices          | ≥ 1 serving/d                     | 0                                  |
| Red and processed meat        | ≥ 1.5 serving/d                   | 0                                  |
| Trans fat                     | ≥ 4% of total energy              | ≤ 0.5% of total energy             |
| Sodium                        | Highest decile                    | Lowest decile                      |
| Alcohol                       | 0 or ≥ 2.5 drinks/d               | 0.5-1.5 drinks/d                   |
| <b>TOTAL</b>                  | <b>0</b>                          | <b>110</b>                         |

EPA, eicosapentaenoic acid; DHA, docosahexaenoic acid; MUFA, monounsaturated fatty acids; SFA, saturated fatty acids; SSB, sugar sweetened beverages.

**Table S3. Dietary Approaches to Stop Hypertension (DASH) diet components and criteria for scoring**

| <b>Component</b>                | <b>Criteria for min point (1)</b> | <b>Criteria for max point (5)</b> |
|---------------------------------|-----------------------------------|-----------------------------------|
| Vegetables (excluding potatoes) | Lowest quintile                   | Highest quintile                  |
| Fruit (excluding juices)        | Lowest quintile                   | Highest quintile                  |
| Whole grain                     | Lowest quintile                   | Highest quintile                  |
| Nuts and legumes                | Lowest quintile                   | Highest quintile                  |
| Low-fat dairy                   | Lowest quintile                   | Highest quintile                  |
| Red & processed meat            | Highest quintile                  | Lowest quintile                   |
| Sodium                          | Highest quintile                  | Lowest quintile                   |
| SSB and fruit juices            | Highest quintile                  | Lowest quintile                   |
| <b>TOTAL</b>                    | <b>5</b>                          | <b>40</b>                         |

SSB, sugar sweetened beverages.

**Table S4. Healthy Eating Index (HEI)-2015 components and criteria for scoring\***

| <b>Component</b>           | <b>Daily intake for min point (0)</b> | <b>Daily intake for max point (5 or 10)</b> | <b>Max point</b> |
|----------------------------|---------------------------------------|---------------------------------------------|------------------|
| Total vegetables           | 0                                     | ≥ 1.1 cup equivalent                        | 5                |
| Greens and beans           | 0                                     | ≥ 0.2 cup equivalent                        | 5                |
| Total fruit                | 0                                     | ≥ 0.8 cup equivalent                        | 5                |
| Whole fruit                | 0                                     | ≥ 0.4 cup equivalent                        | 5                |
| Whole grain                | 0                                     | ≥ 1.5 cup equivalent                        | 10               |
| Total dairy                | 0                                     | ≥ 1.3 cup equivalent                        | 10               |
| Total protein foods        | 0                                     | ≥ 2.5 oz equivalent                         | 5                |
| Seafood and plant proteins | 0                                     | ≥ 0.8 oz equivalent                         | 5                |
| Fatty acid ratio           | (PUFA + MUFA) / SFA ≤ 1.2             | (PUFA + MUFA) / SFA ≥ 2.5                   | 10               |
| Sodium                     | ≥ 2.0 g                               | ≤ 1.1 g                                     | 10               |
| Refined grains             | ≥ 4.3 oz equivalent                   | ≤ 1.8 oz equivalent                         | 10               |
| Added sugar                | ≥ 26% of energy                       | ≤ 6.5% of energy                            | 10               |
| Saturated fat              | ≥ 16% of energy                       | ≤ 8% of energy                              | 10               |
| <b>TOTAL</b>               | <b>0</b>                              |                                             | <b>100</b>       |

MUFA, monounsaturated fatty acids; PUFA, polyunsaturated fatty acids; SFA, saturated fatty acids.

\*All standards for food groups in HEI-2015 represent amounts per 1000 kcal.

**Table S5. Procedures for identification and adjudication of incident cases of peripheral arterial disease**

| No.                        | Procedures                            | Details                                                                                                                                                                          | N (%*)      |
|----------------------------|---------------------------------------|----------------------------------------------------------------------------------------------------------------------------------------------------------------------------------|-------------|
| 1                          | Surgery, angioplasty, or thrombolysis | Surgery, angioplasty, or thrombolysis for PAD                                                                                                                                    | 842 (81.3%) |
| 2                          | Ultrasonography or angiography        | Obstruction or ulcerated plaque ( $\geq 50\%$ of the diameter or $\geq 75\%$ of the cross-sectional area) demonstrated on ultrasound or angiogram of the iliac arteries or below | 713 (68.8%) |
| 3                          | Exertional leg pain                   | Exertional leg pain relieved by rest in combination with: 1) claudication diagnosed by physician; and/or 2) ankle-arm systolic blood pressure ratio $\leq 0.80$                  | 297 (28.7%) |
| 4                          | No doppler pulse in vessels           | Absence of pulse by doppler in any major vessel of lower extremities                                                                                                             | 108 (10.4%) |
| 5                          | Amputation of one or more toes        | Amputation of one or more toes or part of the lower extremity because of ischemia or gangrene                                                                                    | 68 (6.6%)   |
| 6                          | Positive exercise test                | Exercise test that is positive for lower extremity claudication                                                                                                                  | 17 (1.6%)   |
| By 1 or 2                  |                                       |                                                                                                                                                                                  | 976 (94.2%) |
| By 1 or 2 or 3             |                                       |                                                                                                                                                                                  | 995 (96.0%) |
| By at least two procedures |                                       |                                                                                                                                                                                  | 709 (68.4%) |

\*Percent cases among 1036 incident PAD cases included in the analysis.

**Table S6. Subgroup analyses for the association of diet quality indices with risk of peripheral arterial disease in the Women's Health Initiative\***

| Subgroup                 | Cases/<br>participants | aMED             |              | AHEI-2010        |              | DASH             |       | HEI-2015         |              |
|--------------------------|------------------------|------------------|--------------|------------------|--------------|------------------|-------|------------------|--------------|
|                          |                        | HR (95% CI)      | P-int        | HR (95% CI)      | P-int        | HR (95% CI)      | P-int | HR (95% CI)      | P-int        |
| Source of sample         |                        |                  |              |                  |              |                  |       |                  |              |
| WHI-OS                   | 569/91,058             | 0.90 (0.82-0.99) | 0.96         | 0.88 (0.81-0.97) | 0.88         | 0.87 (0.80-0.96) | 0.96  | 0.92 (0.84-1.00) | 0.64         |
| WHI-CTs                  | 467/47,448             | 0.91 (0.82-1.01) |              | 0.86 (0.78-0.95) |              | 0.85 (0.77-0.94) |       | 0.85 (0.76-0.94) |              |
| Age                      |                        |                  |              |                  |              |                  |       |                  |              |
| <65 y                    | 374/76,811             | 0.84 (0.75-0.95) | <b>0.017</b> | 0.82 (0.73-0.92) | <b>0.026</b> | 0.85 (0.76-0.95) | 0.15  | 0.85 (0.76-0.95) | 0.10         |
| ≥65 y                    | 662/61,695             | 0.93 (0.86-1.02) |              | 0.90 (0.83-0.99) |              | 0.87 (0.80-0.95) |       | 0.90 (0.83-0.98) |              |
| Race/ethnicity           |                        |                  |              |                  |              |                  |       |                  |              |
| White                    | 835/114,930            | 0.91 (0.84-0.98) | 0.70         | 0.89 (0.83-0.96) | 0.12         | 0.87 (0.79-0.93) | 0.92  | 0.89 (0.83-0.96) | 0.87         |
| Black                    | 154/11,913             | 0.87 (0.73-1.05) |              | 0.76 (0.63-0.91) |              | 0.88 (0.74-1.05) |       | 0.86 (0.72-1.02) |              |
| Hispanic/Latino          | 16/5449                | 0.77 (0.42-1.41) |              | 0.76 (0.41-1.42) |              | 0.83 (0.46-1.49) |       | 0.93 (0.53-1.64) |              |
| Smoking status           |                        |                  |              |                  |              |                  |       |                  |              |
| Never                    | 287/69,942             | 0.96 (0.84-1.09) | 0.35         | 0.87 (0.77-0.99) | 0.55         | 0.86 (0.75-0.98) | 0.77  | 0.93 (0.82-1.06) | 0.96         |
| Former                   | 486/57,333             | 0.90 (0.81-0.99) |              | 0.87 (0.79-0.96) |              | 0.85 (0.77-0.94) |       | 0.84 (0.76-0.93) |              |
| Current                  | 244/9424               | 0.87 (0.76-1.01) |              | 0.89 (0.77-1.03) |              | 0.88 (0.76-1.02) |       | 0.93 (0.81-1.06) |              |
| Body mass index          |                        |                  |              |                  |              |                  |       |                  |              |
| <25 kg/m <sup>2</sup>    | 339/50,284             | 0.88 (0.78-0.99) | 0.44         | 0.86 (0.76-0.97) | 0.72         | 0.82 (0.72-0.92) | 0.18  | 0.89 (0.79-0.99) | 0.35         |
| 25-<30 kg/m <sup>2</sup> | 383/47,549             | 0.94 (0.84-1.05) |              | 0.92 (0.82-1.03) |              | 0.87 (0.78-0.98) |       | 0.86 (0.77-0.96) |              |
| ≥30 kg/m <sup>2</sup>    | 306/39,373             | 0.91 (0.80-1.04) |              | 0.84 (0.74-0.95) |              | 0.90 (0.80-1.03) |       | 0.92 (0.81-1.04) |              |
| Recreational PA†         |                        |                  |              |                  |              |                  |       |                  |              |
| <7.5 MET-h/wk            | 537/59,504             | 0.89 (0.81-0.98) | 0.65         | 0.90 (0.82-0.99) | 0.81         | 0.85 (0.77-0.94) | 0.51  | 0.87 (0.79-0.95) | 0.37         |
| ≥7.5 MET-h/wk            | 441/73,736             | 0.93 (0.84-1.03) |              | 0.88 (0.79-0.97) |              | 0.89 (0.80-0.99) |       | 0.92 (0.83-1.02) |              |
| Hypertension             |                        |                  |              |                  |              |                  |       |                  |              |
| No                       | 373/84,877             | 0.88 (0.78-0.98) | 0.30         | 0.85 (0.76-0.95) | 0.24         | 0.82 (0.73-0.91) | 0.12  | 0.88 (0.78-0.98) | 0.32         |
| Yes                      | 663/53,629             | 0.92 (0.85-1.01) |              | 0.89 (0.82-0.97) |              | 0.89 (0.82-0.97) |       | 0.89 (0.82-0.97) |              |
| Diabetes                 |                        |                  |              |                  |              |                  |       |                  |              |
| No                       | 851/130,575            | 0.89 (0.83-0.96) | 0.76         | 0.86 (0.79-0.92) | 0.35         | 0.85 (0.79-0.92) | 0.88  | 0.89 (0.82-0.95) | 0.80         |
| Yes                      | 182/7825               | 0.97 (0.82-1.16) |              | 0.96 (0.81-1.13) |              | 0.91 (0.77-1.07) |       | 0.88 (0.75-1.03) |              |
| Dyslipidemia             |                        |                  |              |                  |              |                  |       |                  |              |
| No                       | 736/112,720            | 0.89 (0.82-0.97) | 0.47         | 0.85 (0.79-0.92) | 0.062        | 0.84 (0.77-0.91) | 0.11  | 0.85 (0.78-0.92) | <b>0.035</b> |
| Yes                      | 242/19,129             | 0.97 (0.84-1.13) |              | 0.99 (0.86-1.15) |              | 0.97 (0.84-1.12) |       | 1.01 (0.88-1.16) |              |

---

AHEI, alternate Healthy Eating Index; aMED, alternate Mediterranean diet; DASH, Dietary Approaches to Stop Hypertension; HEI, Healthy Eating Index; MET, metabolic equivalent; PA, physical activity; P-int, P value for interaction; wk, week; WHI-CTs, Women's Health Initiative Clinical Trials; WHI-OS, Women's Health Initiative Observational Study.

\*Results were for each SD increment of the dietary pattern scores, and were adjusted for all covariates (where appropriate) listed for model 2 of Table 2 (e.g., when stratifying by hypertension, results were further adjusted for blood pressure levels) in the article.

†Recreational physical activity of 7.5 MET-h/week approximates moderate-to-vigorous physical activity of 150 min/week (the lowest level recommended by the Physical Activity Guidelines for Americans).



**Table S7. Association of major food groups with risk of peripheral arterial disease in the Women’s Health Initiative\***

| Food groups          | Mean ± SD†                    | Quartile         |                  |                  |                  | P-trend      |
|----------------------|-------------------------------|------------------|------------------|------------------|------------------|--------------|
|                      |                               | Q1               | Q2               | Q3               | Q4               |              |
| Fruit                | 1.46 ± 1.25 cup equivalents/d | 1.00 (Referent)  | 0.98 (0.83-1.16) | 0.79 (0.66-0.95) | 0.91 (0.76-1.09) | 0.19         |
| Vegetables           | 1.60 ± 0.94 cup equivalents/d | 1.00 (Referent)  | 0.90 (0.76-1.06) | 0.79 (0.66-0.95) | 0.85 (0.71-1.03) | 0.090        |
| Green vegetables     | 0.12 ± 0.17 cup equivalents/d | 1.00 (Referent)  | 0.91 (0.76-1.08) | 0.99 (0.84-1.18) | 0.83 (0.69-1.00) | 0.081        |
| Whole grain          | 1.47 ± 1.11 oz equivalents/d  | 1.00 (Referent)  | 0.94 (0.80-1.11) | 0.87 (0.73-1.03) | 0.81 (0.68-0.97) | <b>0.014</b> |
| Refined grain        | 4.57 ± 1.65 oz equivalents/d  | 1.00 (Referent)  | 0.96 (0.81-1.13) | 0.93 (0.78-1.11) | 0.90 (0.75-1.07) | 0.23         |
| Nuts and seeds       | 0.42 ± 0.63 oz equivalents/d  | 1.00 (Referent)  | 0.90 (0.76-1.07) | 0.83 (0.70-0.99) | 0.93 (0.78-1.10) | 0.82         |
| Legumes              | 0.17 ± 0.32 cup equivalents/d | 1.00 (Referent)  | 0.94 (0.81-1.11) | 0.80 (0.68-0.85) | 0.77 (0.64-0.93) | <b>0.004</b> |
| Unprocessed red meat | 1.85 ± 1.33 oz equivalents/d  | 1.00 (Referent)  | 1.25 (1.04-1.51) | 1.26 (1.04-1.52) | 1.38 (1.14-1.66) | <b>0.003</b> |
| Processed meat       | 0.51 ± 0.56 oz equivalents/d  | 1.00 (Referent)  | 1.23 (1.01-1.49) | 1.25 (1.03-1.50) | 1.36 (1.13-1.64) | <b>0.004</b> |
| Fish                 | 0.78 ± 0.74 oz equivalents/d  | 1.00 (Referent)  | 0.89 (0.74-1.04) | 0.85 (0.71-1.01) | 1.01 (0.85-1.20) | 0.67         |
| Dairy                | 2.01 ± 1.24 cup equivalents/d | 1.00 (Referent)  | 0.92 (0.78-1.09) | 0.82 (0.69-0.98) | 0.93 (0.78-1.11) | 0.38         |
| Low-fat dairy        | 1.00 ± 0.93 cup equivalents/d | 1.00 (Referent)  | 1.07 (0.90-1.26) | 0.92 (0.77-1.10) | 0.89 (0.74-1.07) | 0.080        |
| Regular soft drinks  | 0.19 ± 0.52 glasses/d         | 1.00 (Referent)  | 0.99 (0.81-1.21) | 1.21 (1.00-1.45) | 1.26 (1.05-1.52) | <b>0.011</b> |
| Fruit juices         | 0.86 ± 0.95 glasses/d         | 1.00 (Referent)  | 0.89 (0.75-1.06) | 0.96 (0.81-1.14) | 0.93 (0.79-1.11) | 0.73         |
| Alcohol              | 5.27 ± 10.7 g/d               |                  |                  |                  |                  |              |
| 0 g/d                |                               | 1.00 (Referent)  |                  |                  |                  |              |
| >0-<5 g/d            |                               | 1.05 (0.82-1.33) |                  |                  |                  |              |
| 5-<15 g/d            |                               | 1.06 (0.81-1.41) |                  |                  |                  |              |
| 15-<25 g/d           |                               | 1.16 (0.83-1.62) |                  |                  |                  |              |
| ≥25 g/d              |                               | 1.17 (0.83-1.65) |                  |                  |                  |              |

\*All individual food groups (except for alcohol) were adjusted for total energy intake at 2000 kcal/d. Results were adjusted for all covariates (where appropriate) listed for model 2 of Table 2 in the article.

†The estimates for what counts as an ounce or cup equivalent of food groups are rounded to commonly used, consumer-friendly measures and, as such, could vary by foods. Definitions and determination of what counts as one equivalent of food groups can be found at:

[https://www.ars.usda.gov/ARUserFiles/80400530/pdf/mped/mped2\\_doc.pdf](https://www.ars.usda.gov/ARUserFiles/80400530/pdf/mped/mped2_doc.pdf)

**Table S8. Association of five food groups with risk of peripheral arterial disease after multivariable and mutual adjustment\***

| Food groups                                 | Quartile        |                  |                  |                  | P-trend |
|---------------------------------------------|-----------------|------------------|------------------|------------------|---------|
|                                             | Q1              | Q2               | Q3               | Q4               |         |
| Whole grain                                 |                 |                  |                  |                  |         |
| Median (range), oz equivalents/d            | 0.38 (<0.69)    | 0.98 (0.69-1.27) | 1.60 (1.28-2.03) | 2.72 (>2.03)     |         |
| Model 2 (HR [95% CI]) + other 4 food groups | 1.00 (Referent) | 0.97 (0.82-1.15) | 0.92 (0.77-1.09) | 0.88 (0.74-1.06) | 0.12    |
| Legumes                                     |                 |                  |                  |                  |         |
| Median (range), cup equivalents/d           | 0.01 (<0.04)    | 0.06 (0.04-0.08) | 0.13 (0.09-0.18) | 0.31 (>0.18)     |         |
| Model 2 (HR [95% CI]) + other 4 food groups | 1.00 (Referent) | 0.93 (0.79-1.09) | 0.79 (0.67-0.94) | 0.80 (0.66-0.96) | 0.012   |
| Unprocessed red meat                        |                 |                  |                  |                  |         |
| Median (range), oz equivalents/d            | 0.48 (<0.85)    | 1.19 (0.85-1.54) | 1.95 (1.55-2.48) | 3.30 (>2.48)     |         |
| Model 2 (HR [95% CI]) + other 4 food groups | 1.00 (Referent) | 1.21 (1.00-1.46) | 1.20 (0.99-1.45) | 1.30 (1.07-1.57) | 0.018   |
| Processed meat                              |                 |                  |                  |                  |         |
| Median (range), oz equivalents/d            | 0.03 (<0.13)    | 0.22 (0.13-0.32) | 0.46 (0.33-0.67) | 1.07 (>0.67)     |         |
| Model 2 (HR [95% CI]) + other 4 food groups | 1.00 (Referent) | 1.18 (0.98-1.43) | 1.17 (0.97-1.42) | 1.27 (1.05-1.53) | 0.026   |
| Regular soft drinks                         |                 |                  |                  |                  |         |
| Median (range), glasses/d                   | 0 (0-0)         | 0.06 (0.01-0.09) | 0.18 (0.10-0.41) | 0.84 (>0.41)     |         |
| Model 2 (HR [95% CI]) + other 4 food groups | 1.00 (Referent) | 0.97 (0.80-1.19) | 1.17 (0.97-1.41) | 1.21 (1.00-1.45) | 0.033   |

\*All food groups were adjusted for total energy intake at 2000 kcal/d. Covariates for model 2 are listed in the footnote to Table 2 in the article.

†The estimates for what counts as an ounce or cup equivalent of food groups are rounded to commonly used, consumer-friendly measures and, as such, could vary by foods. Definitions and determination of what counts as one equivalent of food groups can be found at:

[https://www.ars.usda.gov/ARSUserFiles/80400530/pdf/mped/mped2\\_doc.pdf](https://www.ars.usda.gov/ARSUserFiles/80400530/pdf/mped/mped2_doc.pdf)

**Table S9. Association of nutrients or food components with risk of peripheral arterial disease in the Women's Health Initiative\***

| Nutrients or food components | Mean ± SD       | Quartile        |                  |                  |                  | P-trend      |
|------------------------------|-----------------|-----------------|------------------|------------------|------------------|--------------|
|                              |                 | Q1              | Q2               | Q3               | Q4               |              |
| Dietary fiber                | 20.4 ± 7.2 g/d  | 1.00 (Referent) | 0.85 (0.72-1.01) | 0.84 (0.70-1.00) | 0.78 (0.64-0.94) | <b>0.014</b> |
| SFA                          | 24.1 ± 7.4 g/d  | 1.00 (Referent) | 0.97 (0.80-1.17) | 0.99 (0.82-1.19) | 1.12 (0.92-1.35) | 0.20         |
| MUFA                         | 27.5 ± 7.8 g/d  | 1.00 (Referent) | 0.86 (0.71-1.04) | 1.02 (0.84-1.23) | 1.07 (0.88-1.29) | 0.24         |
| Ratio of MUFA/SFA            | 1.17 ± 0.24     | 1.00 (Referent) | 0.89 (0.74-1.06) | 0.88 (0.74-1.05) | 0.92 (0.78-1.09) | 0.42         |
| Marine PUFA                  | 161 ± 158 mg/d  | 1.00 (Referent) | 0.97 (0.82-1.15) | 0.94 (0.79-1.12) | 0.95 (0.79-1.14) | 0.58         |
| Non-marine PUFA              | 15.0 ± 4.9 g/d  | 1.00 (Referent) | 0.94 (0.78-1.13) | 0.92 (0.76-1.10) | 1.00 (0.83-1.19) | 0.89         |
| Ratio of (MUFA + PUFA)/SFA   | 1.83 ± 0.44     | 1.00 (Referent) | 0.87 (0.73-1.04) | 0.94 (0.79-1.12) | 0.93 (0.78-1.10) | 0.62         |
| Trans fat                    | 5.11 ± 2.53 g/d | 1.00 (Referent) | 0.99 (0.81-1.20) | 1.21 (1.00-1.46) | 1.09 (0.90-1.33) | 0.29         |
| Sodium                       | 3.36 ± 0.59 g/d | 1.00 (Referent) | 1.14 (0.95-1.36) | 1.09 (0.91-1.31) | 1.08 (0.90-1.29) | 0.55         |
| Added sugar                  | 57.8 ± 28.0 g/d | 1.00 (Referent) | 1.03 (0.87-1.23) | 1.08 (0.90-1.29) | 1.14 (0.96-1.36) | 0.12         |
| Animal protein               | 58.5 ± 17.3 g/d | 1.00 (Referent) | 1.12 (0.94-1.34) | 1.19 (1.00-1.42) | 1.11 (0.93-1.33) | 0.22         |
| Vegetable protein            | 25.2 ± 6.9 g/d  | 1.00 (Referent) | 0.92 (0.78-1.09) | 0.93 (0.78-1.10) | 0.76 (0.62-0.91) | <b>0.006</b> |

MUFA, monounsaturated fatty acids; PUFA, polyunsaturated fatty acids; Q, quartile; SFA, saturated fatty acids.

\*All individual nutrients or food components were adjusted for total energy intake at 2000 kcal/d; results were adjusted for all covariates (where appropriate) listed for model 2 of Table 2 in the article.

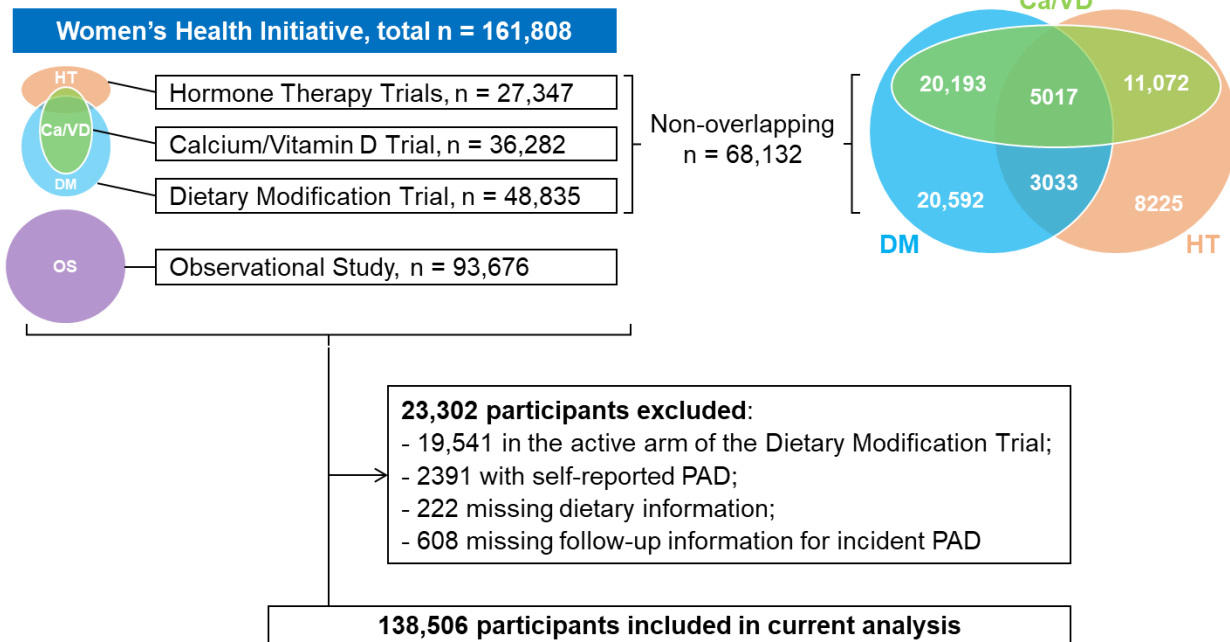

**Figure S1. An overview of the Women's Health Initiative Clinical Trials and Observational Study and selection of participant for current analysis.**

Ca/VD, Calcium/Vitamin D; DM, Dietary Modification; PAD, peripheral arterial disease; HT, Hormone Therapy.

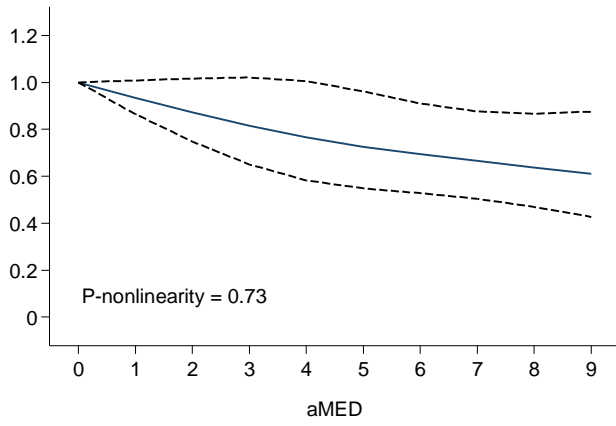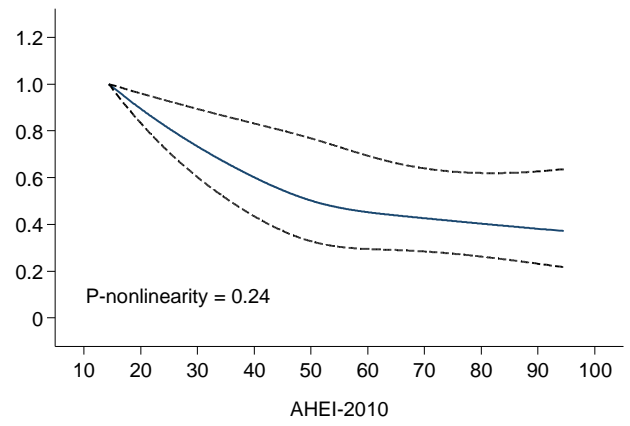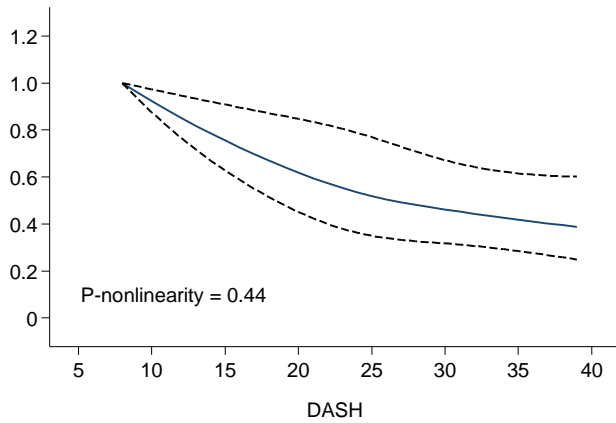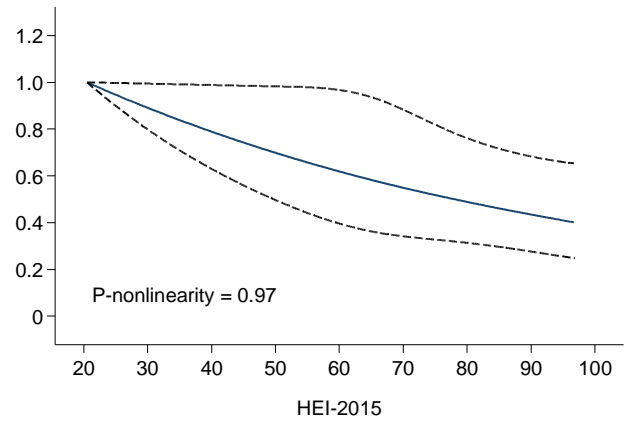

**Figure S2. Restricted cubic splines showing linear inverse associations between diet quality scores and risk of peripheral arterial disease.**

Results were adjusted for all covariates listed for model 2 of Table 2 in the article. AHEI, alternate Healthy Eating Index; aMED, alternate Mediterranean diet; DASH, Dietary Approaches to Stop Hypertension; HEI, Healthy Eating Index.

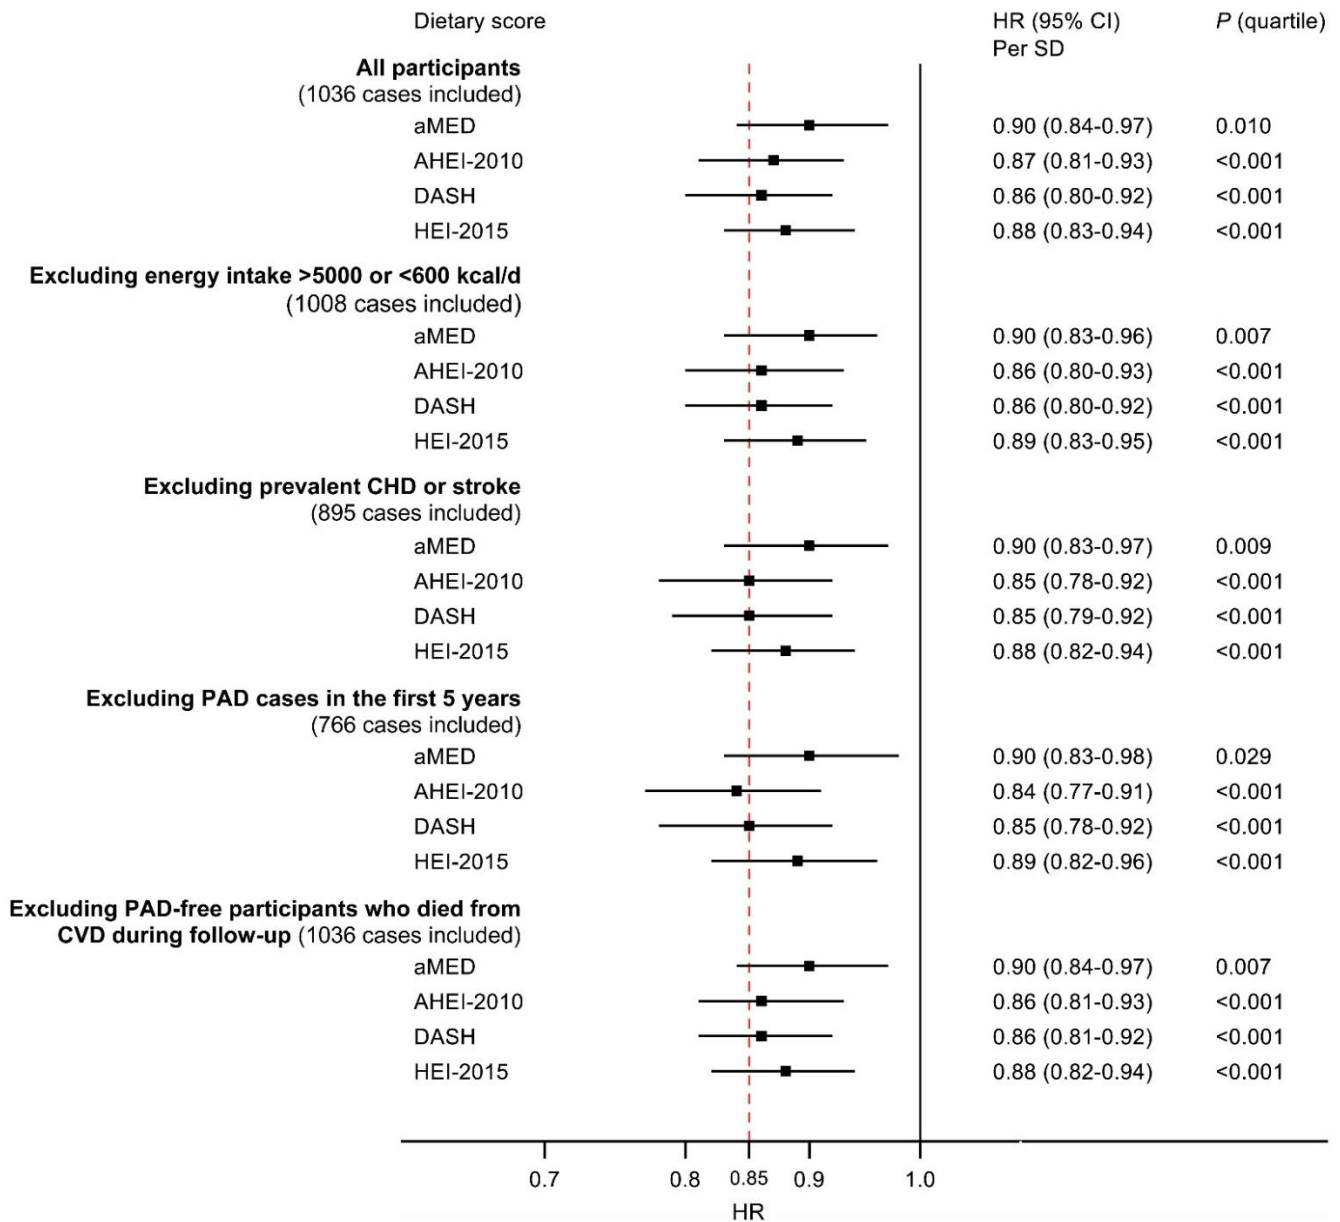

**Figure S3. Sensitivity analyses for the association of diet quality indices with risk of peripheral arterial disease.** Results were for per SD increment of the diet quality scores and were adjusted for all covariates listed for model 2 of Table 2 in the article. P values are P for trend across quartile of the dietary scores. AHEI, alternate Healthy Eating Index; aMED, alternate Mediterranean diet; CHD, coronary heart disease; CVD, cardiovascular disease; DASH, Dietary Approaches to Stop Hypertension; HEI, Healthy Eating Index; PAD, peripheral arterial disease.
